# Supplementary material for: Assessment of Parental Knowledge, Attitude, and Practice Regarding Oral Complications of Chemotherapy and Radiotherapy in Children with Leukemia in 2024–2025: A Cross-Sectional Study
Source: Research Square preprint supplement (doi:10.21203/rs.3.rs-7475008/v1), 2025-09-17
Supplement: Supplementary file 1 [file 7cd793b093a741b01644ae88.docx]

**Questionnaire**

Dear Parent**:**

Greetings and respect,

This study is part of a research project/thesis titled: "Assessment of knowledge, Attitude, and Practice of Parents of Children with Leukemia Regarding Oral Complications of Chemotherapy and Radiotherapy in Seyed-al-Shohada Hospital, Isfahan (2024–2025)" conducted by Dr Nosrat Nourbakhsh and Ailar Adib Haji Bagheri from the Faculty of Dentistry, Isfahan University of Medical Sciences.

Your participation in this questionnaire is entirely voluntary, and choosing not to complete it will have no negative consequences for you. Furthermore, your participation involves no risk or cost. At this stage, your only task is to complete the questionnaire honestly. The researchers assure you that your responses and personal information will remain strictly confidential, and the results will be published collectively and anonymously.

Your participation may contribute significantly to the oral health assessment of your child. Therefore, we kindly invite you to participate by answering the questions sincerely.

I have read this consent form and agree to participate in the study with full awareness of its conditions.

Questionnaire Code:

Signature:

**Demographic Information**

Please answer the following questions about yourself:

1. Gender:  Female  Male
2. Age:  Under 20  20–40  Over 40
3. Spouse’s age:
4. Father’s occupation:
5. Education level:  Illiterate  Below diploma  Diploma  Associate  Bachelor’s or higher
6. Type of leukemia your child has:
7. Time since diagnosis:  Less than 6 months  More than 6 months
8. Has your child undergone chemotherapy?  Yes  No
9. Has your child undergone radiotherapy?  Yes  No
10. How many chemotherapy sessions has your child received?
11. What were your child’s symptoms before diagnosis?
12. Number of children in the family:
13. Age of the affected child:
14. Birth order of the affected child:
15. Gender of the affected child:
16. City or town of residence:
17. Are you insured?  Yes  No
18. Does your child suffer from leukemia-related complications?
19. If yes, what actions have you taken to reduce these complications?

**Section 1: Knowledge**

**Instructions:** Please mark one answer for each statement.

**Response Options**: True  False  Don’t know

| **No.** | **Statement** | **True** | **False** | **I don't know** |
| --- | --- | --- | --- | --- |
| 1 | Small red spots on the oral mucosa are common signs of leukemia. | ☐ | ☐ | ☐ |
| 2 | Leukemia can affect the gums, including increased gingival volume and pale coloration. | ☐ | ☐ | ☐ |
| 3 | Oral ulcers without an identifiable cause may be one of the signs of leukemia. | ☐ | ☐ | ☐ |
| 4 | Dry mouth is a known side effect of chemotherapy and radiotherapy. | ☐ | ☐ | ☐ |
| 5 | Leukemia medications have no effect on the oral mucosa. | ☐ | ☐ | ☐ |
| 6 | Chewing sugar-free gum increases the oral complications of leukemia. | ☐ | ☐ | ☐ |
| 7 | Using a toothbrush and maintaining oral hygiene reduces the risk of cavities and gum disease. | ☐ | ☐ | ☐ |
| 8 | Children with leukemia should use a soft toothbrush twice a day. | ☐ | ☐ | ☐ |
| 9 | Orthodontic treatment does not interfere with leukemia therapy. | ☐ | ☐ | ☐ |
| 10 | Chemotherapy and radiotherapy can increase the risk of dental caries. | ☐ | ☐ | ☐ |
| 11 | A leukemia-affected child may experience dental pain even if the tooth appears clinically healthy. | ☐ | ☐ | ☐ |
| 12 | Artificial saliva and sugar-free gum can help reduce the discomfort of dry mouth in children with leukemia. | ☐ | ☐ | ☐ |

**Section 2: Attitude**

**Instructions:** Please mark one answer for each statement.
**Response Options:** ☐ Strongly agree ☐ Agree ☐ Neutral ☐ Disagree ☐ Strongly disagree

| **No.** | **Statement** |
| --- | --- |
| 1 | Visiting the dentist prior to initiating chemotherapy is essential. |
| 2 | The physician should inform parents about the disease trajectory and prognosis. |
| 3 | The physician should inform parents about the possible treatment side effects affecting their child. |
| 4 | Education and guidance regarding prevention methods can help reduce treatment-related complications of leukemia. |
| 5 | The emphasis on tooth brushing and oral hygiene as a factor in oral health is exaggerated by advertising. |
| 6 | Considering the costs of leukemia treatment, dental visits are not economically justified. |
| 7 | When a child is undergoing leukemia treatment, managing chemotherapy and radiotherapy side effects is not a priority. |
| 8 | Oral and dental health can influence the recovery process from leukemia. |
| 9 | Awareness of the oral signs of leukemia can help facilitate earlier diagnosis. |
| 10 | Given the high risk of infection in leukemia patients, treating decayed teeth in the affected child is highly important. |
| 11 | I have adequate awareness of the oral side effects of chemotherapy and radiotherapy. |
| 12 | I have adequate awareness of methods to prevent oral-dental complications resulting from chemotherapy and radiotherapy. |

**Section 3: Practice**

**Instructions:** Please mark one answer for each statement.
**Response Options:** ☐ Always ☐ Often ☐ Sometimes ☐ Rarely ☐ Never

| **No.** | **Statement** |
| --- | --- |
| 1 | I tell my child to brush their teeth daily. |
| 2 | I brush the teeth of my child under six years old myself. |
| 3 | I supervise the tooth brushing of my child over six years old. |
| 4 | I use a soft toothbrush for my child. |
| 5 | If my child is undergoing leukemia treatment and has severe oral ulcers, they use an extra-soft toothbrush. |
| 6 | My child uses sugar-free gum to reduce dry mouth caused by chemotherapy. |
| 7 | My child uses artificial saliva to reduce dry mouth caused by chemotherapy, based on the recommendation of a physician or dentist. |
| 8 | I tell my child to regularly use fluoride toothpaste. |
| 9 | My child received dental treatment before starting chemotherapy. |
| 10 | I take my child with leukemia to a regular dentist every three months for dental care. |
